# Supplementary material
Source: PubMed Central journal article supplement (PMC3949176)
Supplement: NIHMS558770-supplement-Supp_Fig_S1.pdf [file NIHMS558770-supplement-Supp_Fig_S1.pdf]

## Supplemental Figure

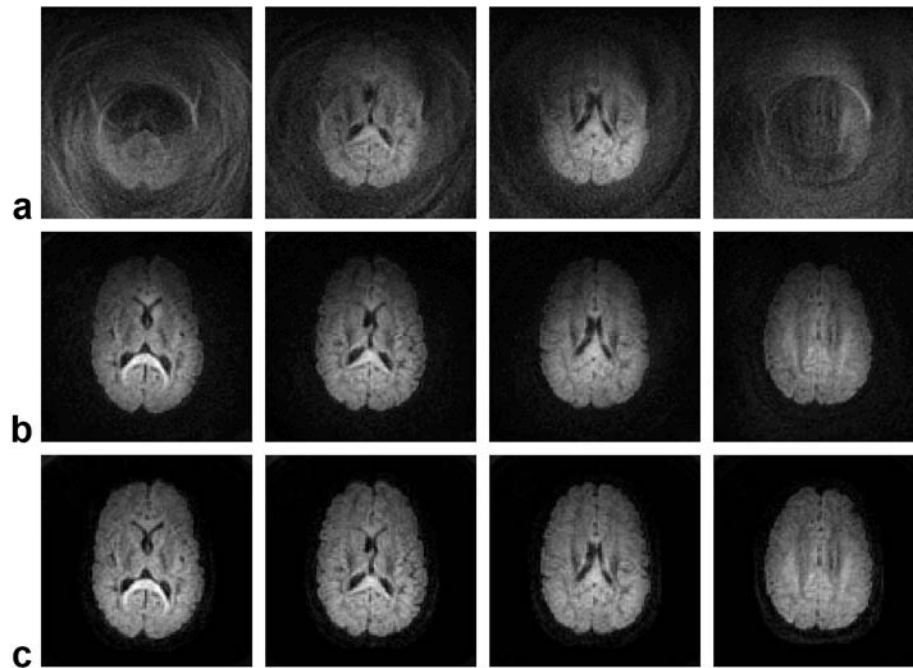

FIG. S1. Two-shot spiral diffusion-weighted images in four axial slices uncorrected (**a**) and reconstructed with the iterative phase correction method proposed in (10) (**b**) or with the SENSE+CG method proposed in this work (**c**). The images shown in (**a,b**) are the same as those shown in Fig. 4a,b of (10) and all images were reconstructed with the same off-resonance correction method. This figure shows that both the iterative phase correction method and the SENSE+CG method can largely reduce the motion-induced signal loss and aliasing artifacts. In the frontal regions, the performance of the SENSE+CG method is even slightly higher, most likely because of its ability to correct not only for linear phase errors caused by rigid-body motion, but also for residual nonlinear phase errors caused by nonrigid motion that were not fully corrected with the cardiac gating method used in (10).
